# Supplementary material for: Recombinant Expression of Thrombolytic Agent Reteplase in Marine Microalga Tetraselmis subcordiformis (Chlorodendrales, Chlorophyta)
Source: MDPI journal article supplement (doi:10.3390/md19060315), 2021-05-28
Supplement: s1 [file s1]

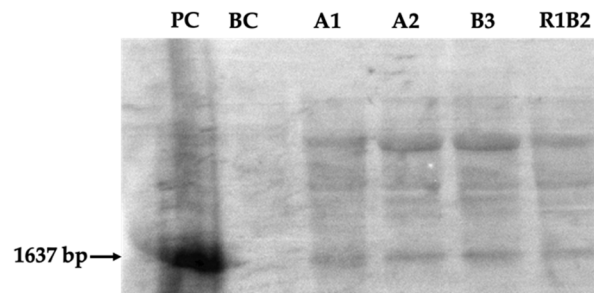

Figure S1. Southern blotting detection for colonies A1, A2, B3 and R1B2.

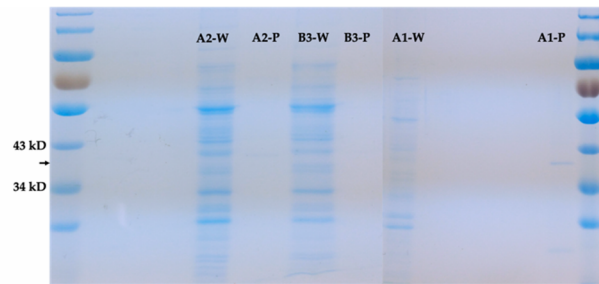

Figure S2. The SDS-PAGE gel of colony A1, A2 and B3. W: total soluble proteins extracted from *T. subcordiformis*; P: purified proteins with  $\text{Ni}^{2+}$ -NTA affinity chromatography.
